# Supplementary material for: A nanoporous gold-based electrochemical aptasensor for sensitive detection of cocaine
Source: PubMed Central journal article supplement (PMC9066177; doi:10.1039/c9ra01292c), 2019-05-07
Supplement: RA-009-C9RA01292C-s001.pdf [file RA-009-C9RA01292C-s001.pdf]

Supporting information for:

**A nanoporous gold-based electrochemical aptasensor for sensitive detection of cocaine**

*Department of Chemistry, Payame Noor University, P.O. Box 19395-4697, Tehran, Iran*

*Corresponding author Email: Tavakkolinahid@yahoo.com*

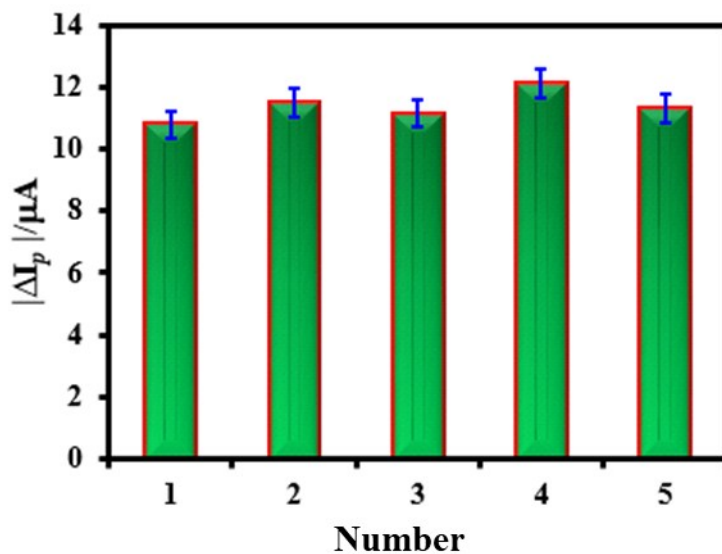

**Fig. S1.** SWV response of the aptasensor for 5 consecutive scans with the same electrode in 10  $\mu M$  cocaine solution.

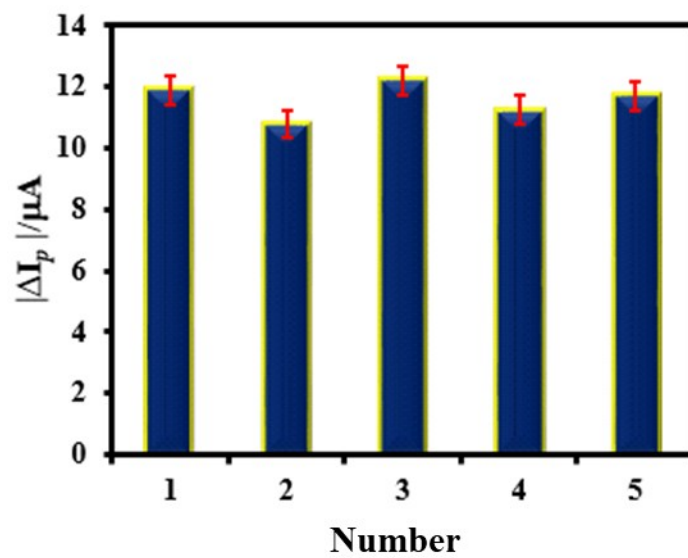

**Fig. S2.** SWV response of 5 independently modified electrodes toward 10 μM cocaine.
